# Supplementary material for: HPLC-Based Chemometric Analysis for Coffee Adulteration
Source: MDPI journal article supplement (doi:10.3390/foods9070880), 2020-07-04
Supplement: s1 [file s1]

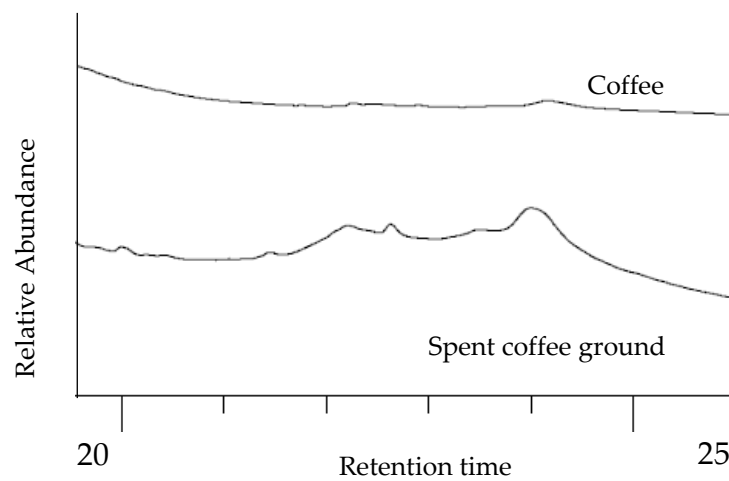

Figure S1. HPLC chromatogram of coffee and spent coffee ground sample for 20–25 mins of retention time.
